# Supplementary material for: Development of migrating tendon-bone attachments involves replacement of progenitor populations
Source: Oxford University Press journal article supplement (doi:10.1242/dev.165381), 2018-11-30
Supplement: dev165381supp.pdf [file dev165381supp.pdf]

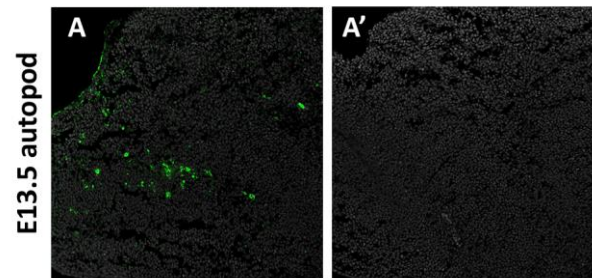

**Figure S1. TUNEL staining control**

E13.5 mouse autopod was used as a control for TUNEL staining in Figure 8. Cells positive for TUNEL staining appear green. A, positive control; A', negative control without enzyme.

**Table S1. *In situ* hybridization probes**

| Probe name     | Genomic position | Ref-seq template | Size    |
|----------------|------------------|------------------|---------|
| <i>Col1a1</i>  | 4295 to 4475     | NM_007742.4      | 180 bp  |
| <i>Col2a1</i>  | 4474 to 4879     | NM_001113515.2   | 406 bp  |
| <i>BSP</i>     | 145 to 1058      | NM_008318.3      | 1955 bp |
| <i>Col12a1</i> | 8103 to 8771     | NM_001290308.1   | 689 bp  |
| <i>Tnc*</i>    | 484 to 1118      | NM_011607.3      | 635 bp  |
| <i>Gli1</i>    | 1810 to 2427     | NM_010296.2      | 638 bp  |

\* *Tnc* plasmid was kindly contributed by Professor Murizio Pacifici, Children's Hospital of Philadelphia
